# Supplementary material
Source: Springer Nature journal article supplement (https://www.springermedizin.de/resource/supplementary/12931_2011_1076_MOESM7_ESM.pdf/9425574)

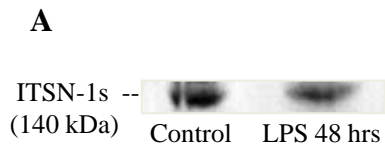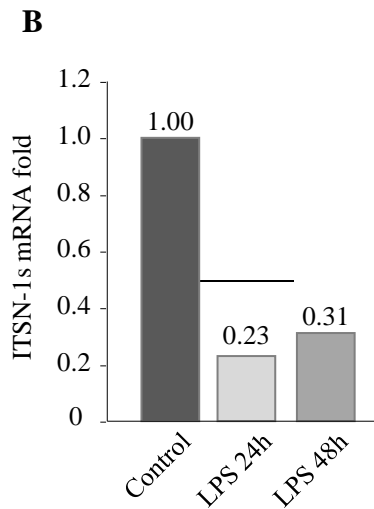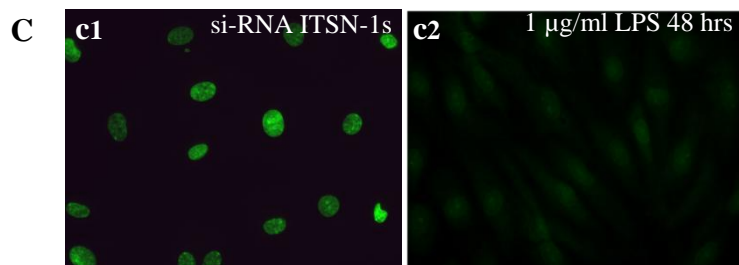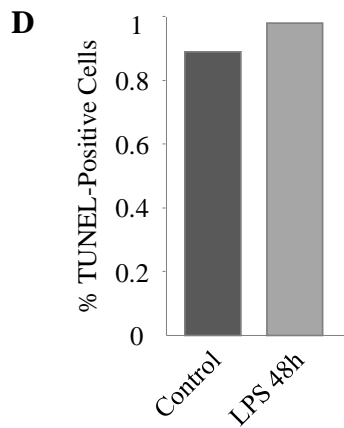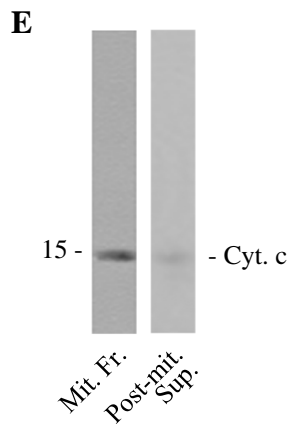

Supplement: MOESM7 [file 9425574]
